# Supplementary figures and images for: Esterification of oleic acid in [Bmim]BF4/[Hmim]HSO4 + TX-100/cyclohexane ionic liquid microemulsion
Source: Royal Society of Chemistry journal article supplement (doi:10.1039/c4ra09408e), 2014-01-01

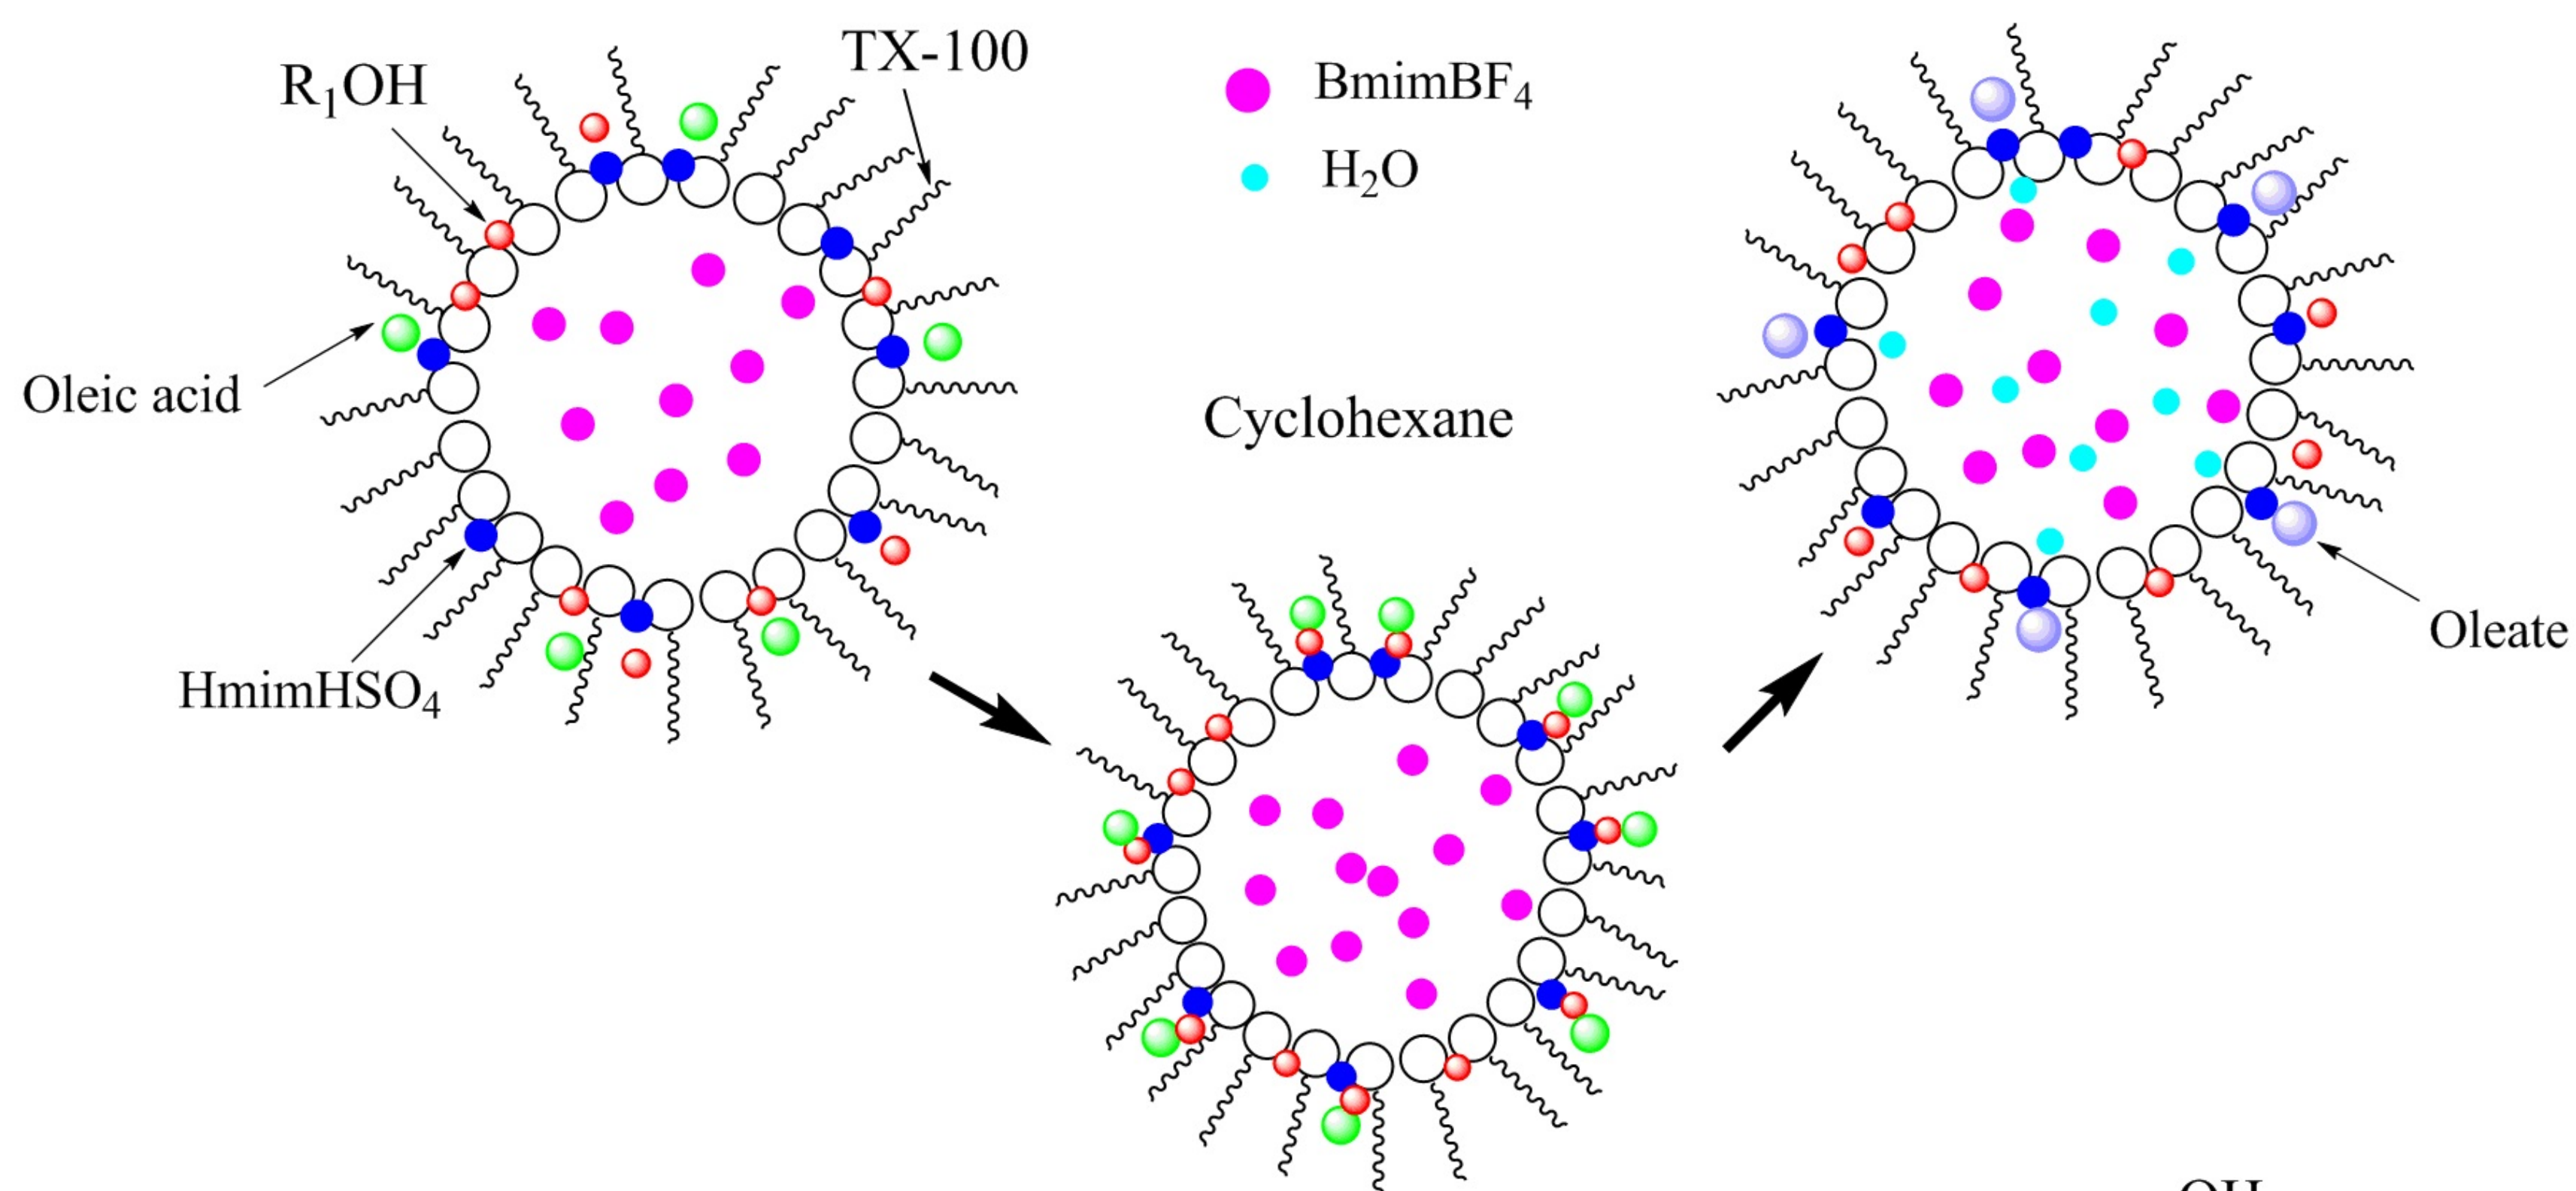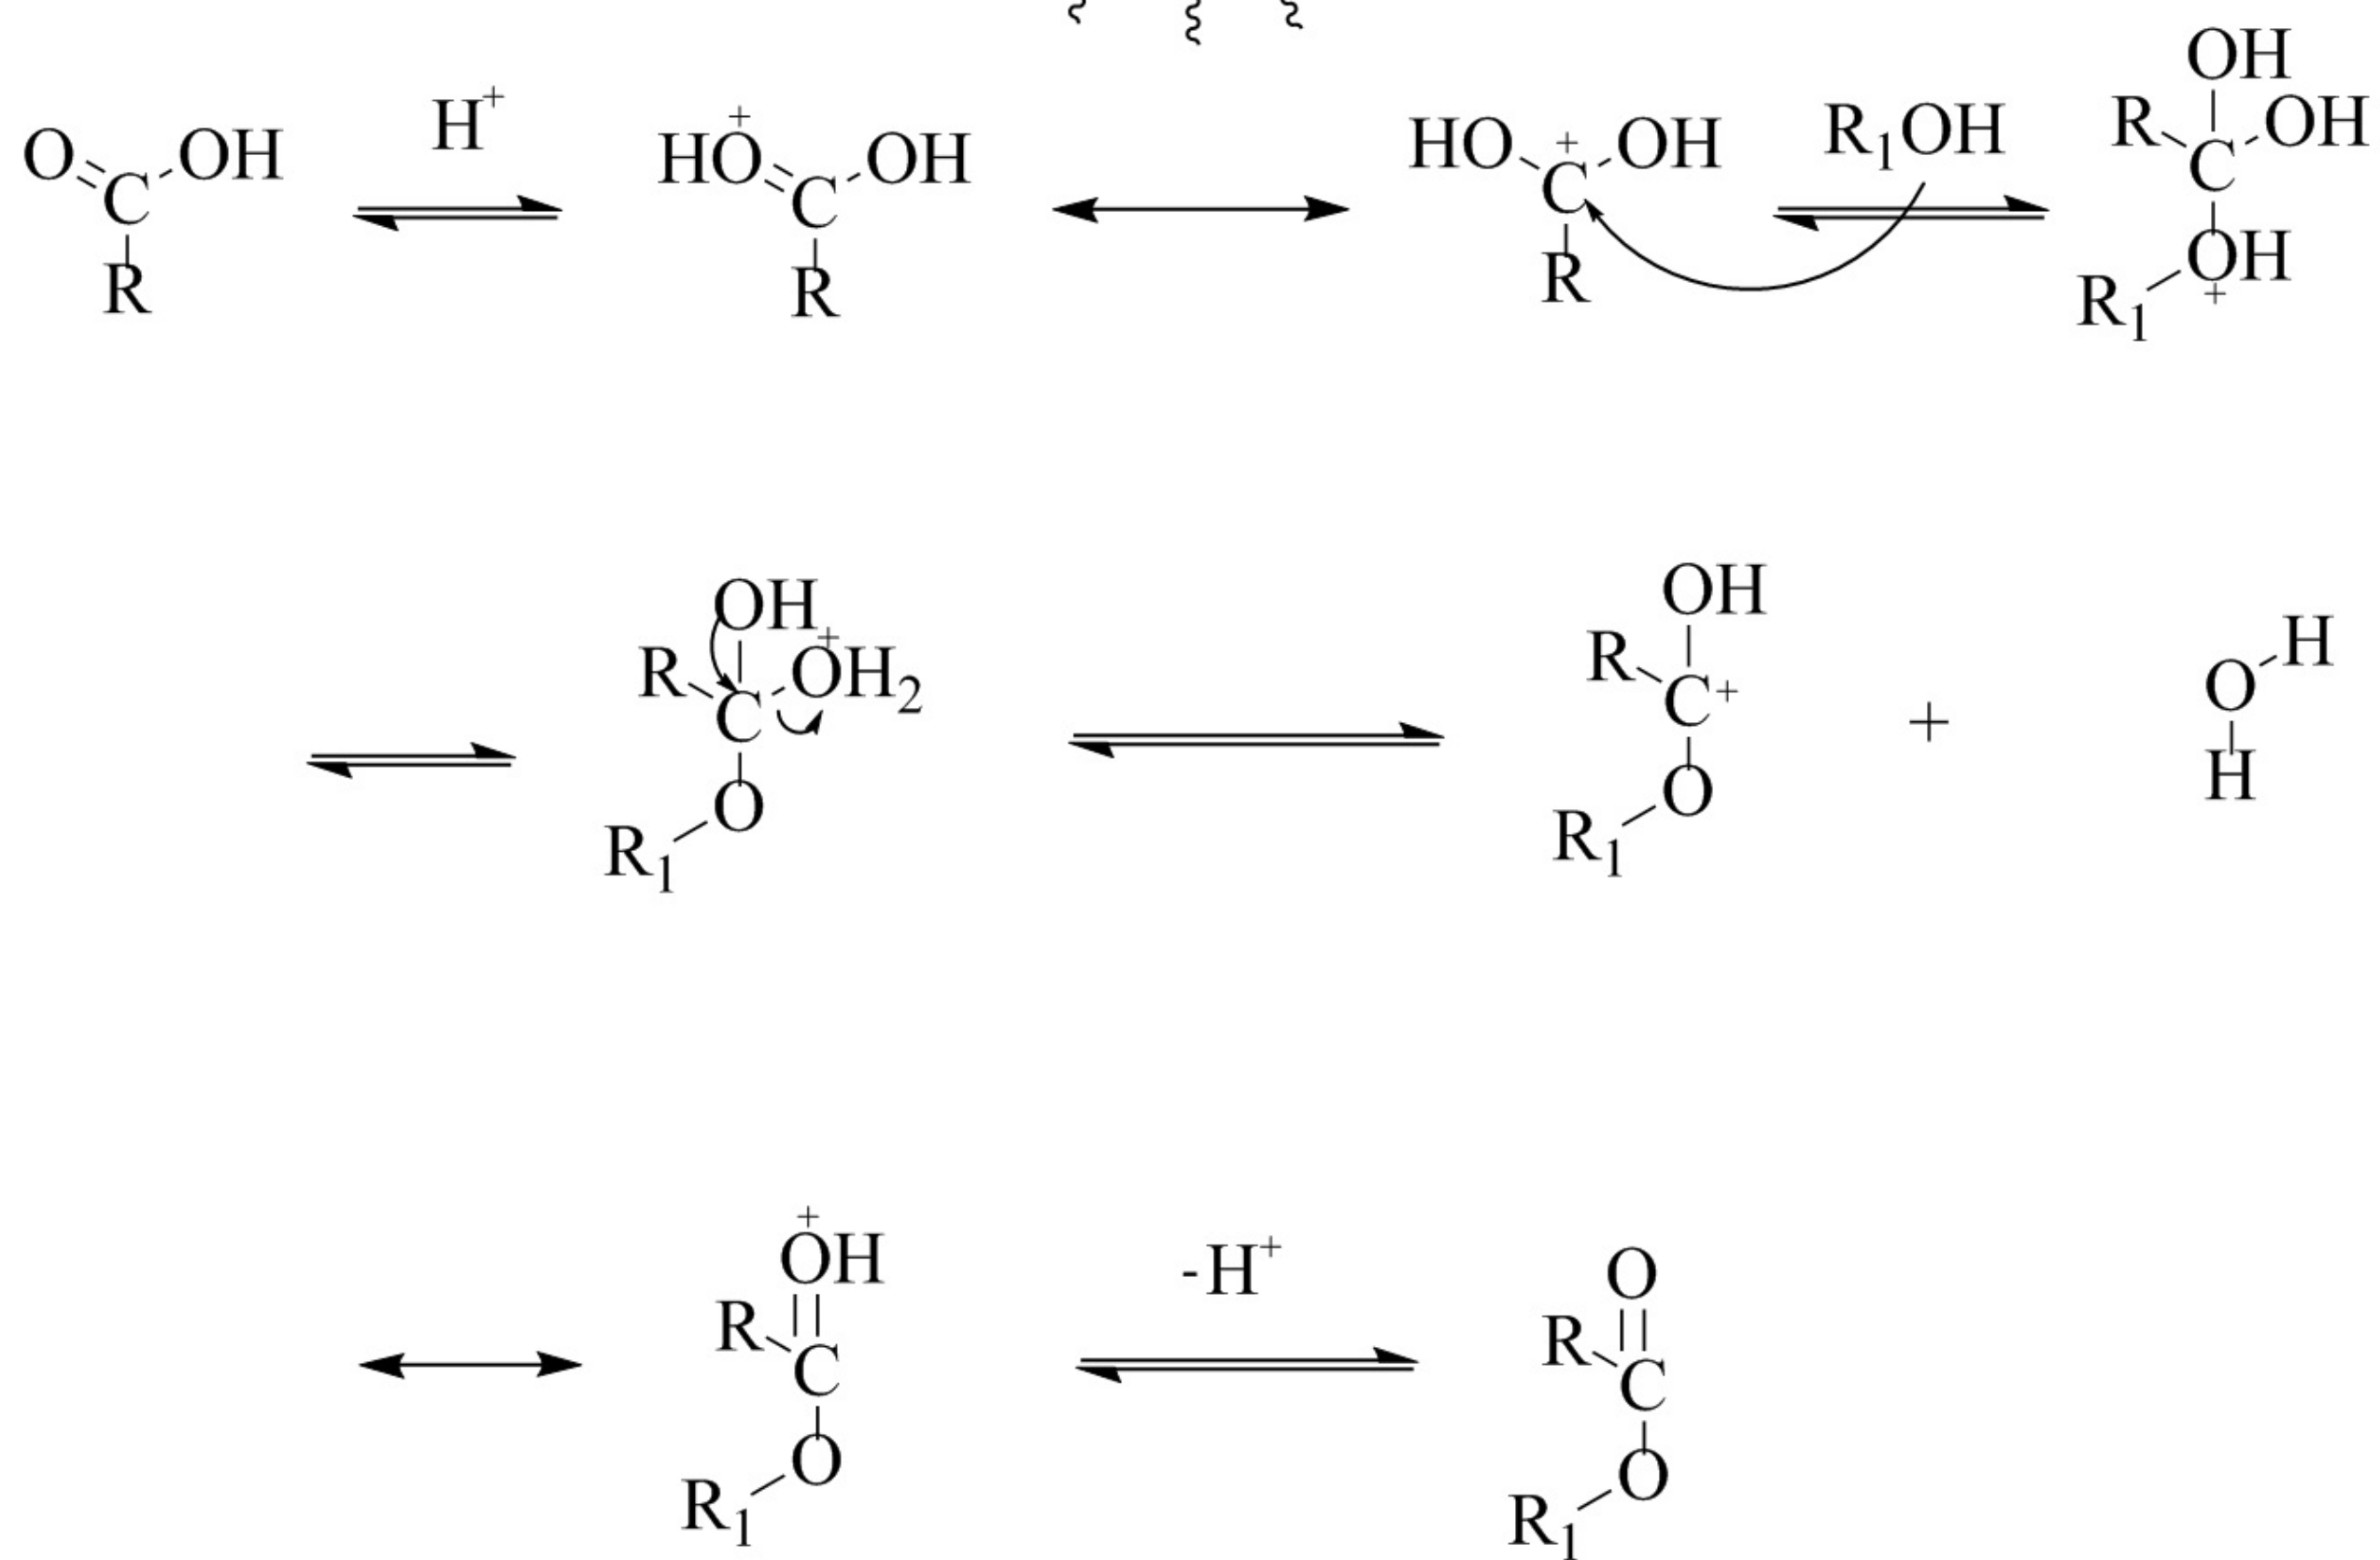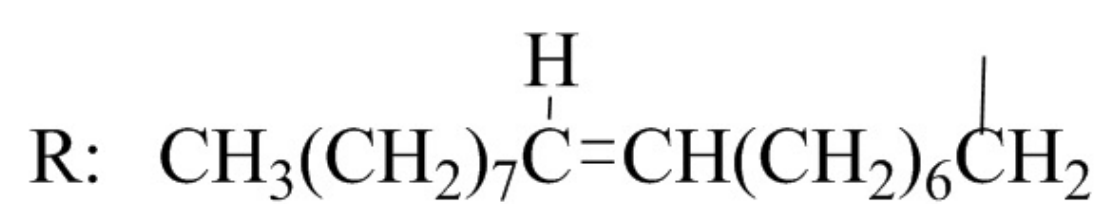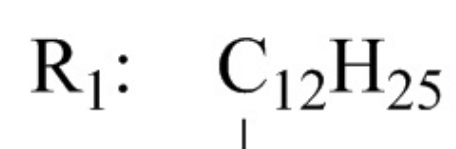

Scheme 1 Proposed mechanism for esterification in ILMs.

Supplement: c4ra09408e1.pdf [file c4ra09408e1.pdf]
